# Supplementary material for: Physiological and Biochemical Mechanisms Mediated by Allelochemical Isoliquiritigenin on the Growth of Lettuce Seedlings
Source: PubMed Central journal article supplement (PMC7076364; doi:10.3390/plants9020245), 2020-02-13
Supplement: plants-09-00245-s001.pdf [file plants-09-00245-s001.pdf]

*Supplementary Materials*

# **Physiological and Biochemical Mechanisms Mediated by Allelochemical Isoliquiritigenin on the Growth of Lettuce Seedlings**

**Shuang Zhang<sup>†</sup>, Shi-Wei Sun<sup>†</sup>, Hai-Lin Shi, Ke Zhao, Jin Wang, Yang Liu, Xiao-Hong Liu and Wei Wang\***

Department of Natural Medicine and Pharmacognosy, School of Pharmacy, Qingdao University, Qingdao 266071, China; qdeduzhangshuang@163.com (S.Z.); sunsw@qdu.edu.cn (S.-W.S.); shihailinjin@163.com (H.-L.S.); Qingdao\_zhaoke@163.com (K.Z.); Qingdao\_wangjin@163.com (J.W.); buckuper@163.com (Y.L.); liuxiaohong1043@163.com (X.-H.L.)

\* Correspondence: w.w.wangwei@263.net; Tel./Fax: +86-532-8699-1172 (W.W.)

<sup>†</sup> These authors contribute equally to this work and joint first authors.

## **Supporting information**

**Figure S-1.** <sup>1</sup>H NMR spectrum of isoliquiritigenin.

**Figure S-2.** <sup>13</sup>C NMR spectrum of isoliquiritigenin.

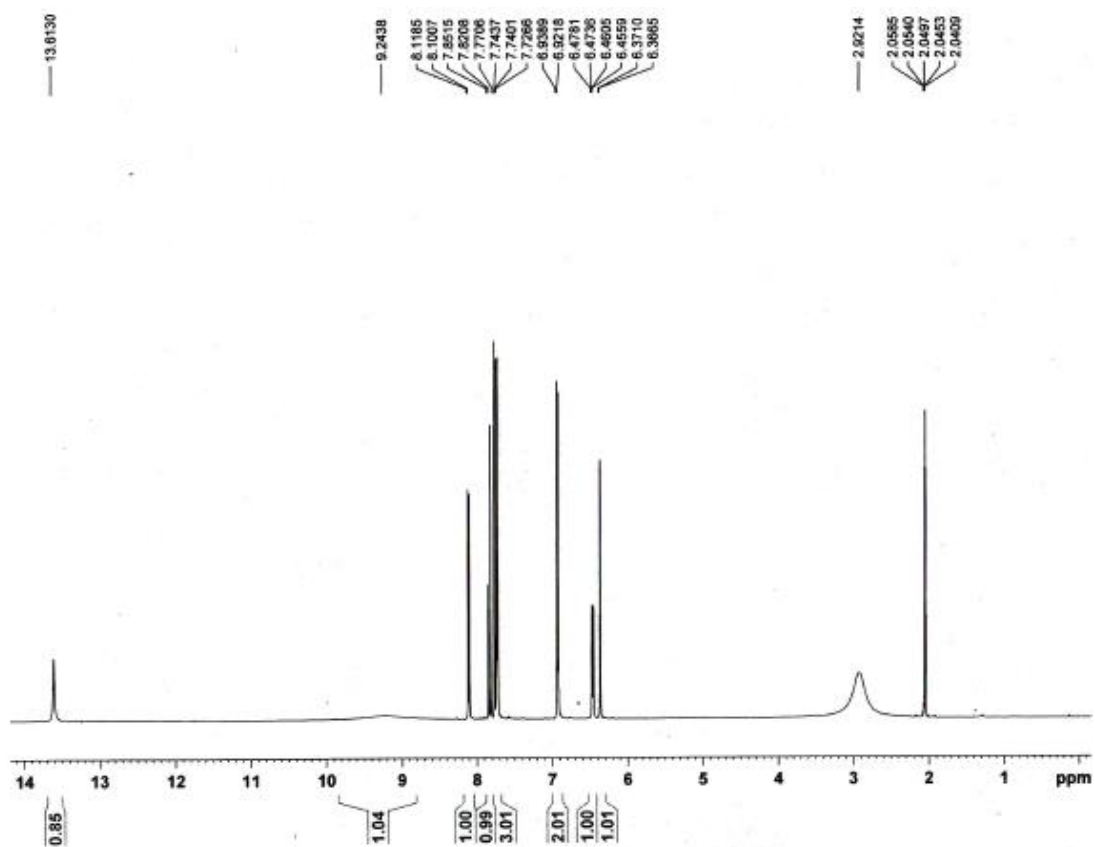

Figure S-1.  $^1\text{H}$  NMR spectrum of isoliquiritigenin.

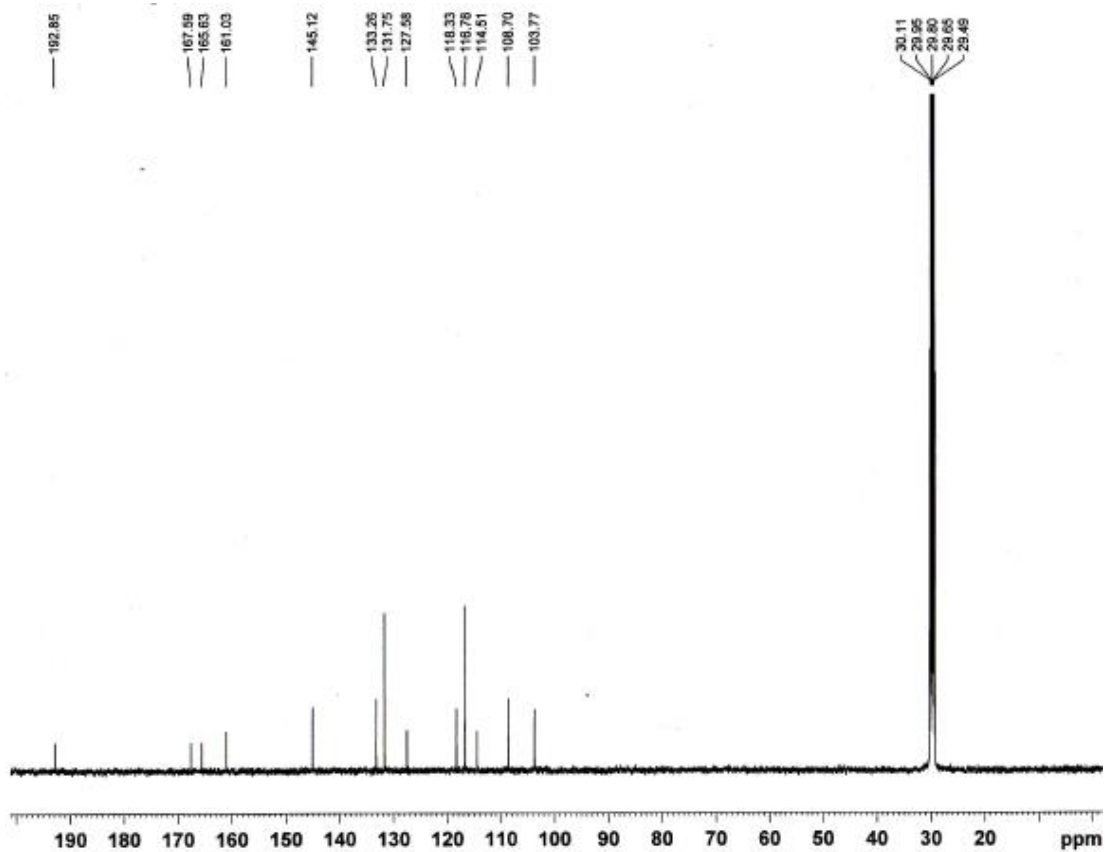

Figure S-2.  $^{13}\text{C}$  NMR spectrum of isoliquiritigenin.
